# Supplementary material
Source: PubMed Central journal article supplement (PMC7212092)
Supplement: EMS86347-supplement-Supplementary_material.pdf [file EMS86347-supplement-Supplementary_material.pdf]

**Table S1. CRISPR primers**

| Name                                                      | Deletion/<br>inversion<br>size | Vector primers                                                                                                                  | Genotyping primers                                                                                                                                                           |
|-----------------------------------------------------------|--------------------------------|---------------------------------------------------------------------------------------------------------------------------------|------------------------------------------------------------------------------------------------------------------------------------------------------------------------------|
| $\Delta$ CTCF1<br>mm9 chr5:<br>28,777,560-<br>28,778,320  | 1.2kb                          | 1F-CACCGGCTAGCCATGAAGACAAGCA<br>1R- AAACGCTTGTCTTCATGGCTAGCC<br>2F- CACCGGGCCCACTATTGTCAGAAAAT<br>2R- AAACATTTCTGACAATAGTGGGCC  | Deletion<br>F- ATGAATGCCTGCAGTGGTTC<br>Wild Type<br>F- CTAATAGCAGCTGACCACGAAC<br>R- TAGACTCAGAGGTTTCGTAAG                                                                    |
| $\Delta$ CTCF2<br>mm9 chr5:<br>28,795,867-<br>28,796,937  | 1.35kb                         | 1F-CACCGATCACATCTGCAGGTATTCC<br>1R- AAACGGAATACCTGCAGATGTGATC<br>2F- CACCGAAATGATTTCCGTCCTCTAC<br>2R- AAACGTAGAGGACGGAAATCATTTC | Deletion<br>F-GAATATAGACTGGTGAATGGATC<br>Wild Type<br>F- AATCACATGGCTGTGAGATAC<br>R- CTCAGCAGCTCCAAGACTG                                                                     |
| $\Delta$ CTCF3<br>mm9 chr5:<br>29,619,575-<br>29,620,326  | 750bp                          | 1F-CACCGATAGCCAGCTTTATGCTTTC<br>1R- AAACGAAAGCATAAAGCTGGCTATC<br>2F- CACCGTGTGCATCTCATACTGAGAA<br>2R- AAACTTCTCAGTATGAGATGCACAC | Deletion<br>F- GCATACTGGCAGCATCACTG<br>Wild Type<br>F- AGACCAGACTTGTCAACTTGG<br>R- CCTGACCCTCAGGTGTTAGC                                                                      |
| $\Delta$ CTCF4<br>mm9 chr5:<br>29,704,457-<br>29,705,661  | 1.3kb                          | 1F-CACCGCACTTGTCGCCGTCATCAT<br>1R- AAACATGATGACGGGCTACAAGTGC<br>2F- CACCGTAAACAACGCCCTTGATATG<br>2R- AAACCATATCAAGGGCGTTGTTTAC  | Deletion<br>F- CCTCAGTTAGCAGGAGATG<br>R- TCAGACACGTTGTTGCTGAC<br>Wild Type<br>F- GCAGCTTAGCACTCTGAAGTC                                                                       |
| $\Delta$ CTCF5<br>mm9 chr5:<br>29,715,776-<br>29,716,437  | 1.2kb                          | 1F-CACCGAAGATGCCTGCTTAGTGCCG<br>1R- AAACCGGCACTAAGCAGGCATCTTC<br>2F- CACCGCATGGAAGTGGACGACATGC<br>2R- AAACGCATGTCGTCCACTTCCATGC | Deletion<br>F- TTACAAGACAAACCATCAGAC<br>Wild Type<br>F- TCAACTTGGATCGGAGAATC<br>R- GTGATCCTGCTGTGGATTAG                                                                      |
| $\Delta$ /Inv35<br>mm9 chr5:<br>29,684,041-<br>29,718,587 | 35kb                           | 1F-CACCGAGCCTCTCACTTTATGCCCC<br>1R- AAACGGGGCATAAAGTGAGAGGCTC<br>2F- CACCGAGGGCTTCATGAATTACACC<br>2R- AAACGGTGTAATTCATGAAGCCCTC | Deletion<br>F- CACATATCACACATATCCAGG<br>Wild Type<br>F- GATTTCTCTGTGTGAAGATC<br>R- AATCATGATTACAGATGAGTG<br>Inversion<br>F- CACATATCACACATATCCAGG<br>R- GATTTCTCTGTGTGAAGATC |

**Table S2. Median interprobe distances for *Cnpy1-Shh*, *Shh-SBE2*, *SBE2-ZRS*, *Shh-ZRS*, *ZRS-Lmbr1*, *ZRS-Mnx1*, *ZRS-Ube3c*, *Lmbr1-Mnx1* probes in wild type and  $\Delta$ CTCF ESCs**

| ESCs              | WT                              | $\Delta$ CTCF1       | $\Delta$ CTCF2       | $\Delta$ CTCF3       | $\Delta$ CTCF4      | $\Delta$ CTCF5       |
|-------------------|---------------------------------|----------------------|----------------------|----------------------|---------------------|----------------------|
| <b>Fosmids</b>    | <b>Interprobe distance (nm)</b> |                      |                      |                      |                     |                      |
| <i>Cnpy1-Shh</i>  | 453                             | 376 ( $p = 0.03$ )   | 439                  |                      |                     |                      |
| <i>Shh-SBE2</i>   | 396                             | 473 ( $p = 0.003$ )  | 474 ( $p = 0.0008$ ) | 443 ( $p = 0.01$ )   | 397                 | 390                  |
| <i>SBE2-ZRS</i>   | 390                             | 473 ( $p < 0.0001$ ) | 522 ( $p < 0.0001$ ) | 551 ( $p < 0.0001$ ) | 449 ( $p = 0.009$ ) | 401                  |
| <i>Shh-ZRS</i>    | 341                             | 449 ( $p = 0.0005$ ) | 449 ( $p < 0.0002$ ) | 453 ( $p < 0.0001$ ) | 324                 | 434 ( $p = 0.0001$ ) |
| <i>ZRS-Lmbr1</i>  | 533                             |                      |                      |                      | 473                 | 427 ( $p = 0.01$ )   |
| <i>ZRS-Mnx1</i>   | 503                             |                      |                      |                      | 427 ( $p = 0.04$ )  | 453                  |
| <i>Lmbr1-Mnx1</i> | 411                             |                      |                      |                      | 406                 | 413                  |

Statistical analysis of data for Figures 3C, S3B, 4C & S4B. Interprobe distances are median values,  $p$ -values from Mann-Whitney U Tests.

**Table S3. Median interprobe distances for *Shh-SBE2*, *SBE2-ZRS* and *Shh-ZRS* probes in wild type and  $\Delta$ CTCF E11.5 limb distal posterior tissue**

| Posterior       | WT                              | $\Delta$ CTCF1      | $\Delta$ CTCF2       | $\Delta$ CTCF3       | $\Delta$ CTCF4     | $\Delta$ CTCF5 |
|-----------------|---------------------------------|---------------------|----------------------|----------------------|--------------------|----------------|
| <b>Fosmids</b>  | <b>Interprobe distance (nm)</b> |                     |                      |                      |                    |                |
| <i>Shh-SBE2</i> | 406                             | 429 ( $p = 0.005$ ) | 428 ( $p = 0.005$ )  | 507 ( $p < 0.0001$ ) | 418 ( $p = 0.04$ ) | 338            |
| <i>SBE2-ZRS</i> | 427                             | 428                 | 617 ( $p < 0.0001$ ) | 406                  | 446                | 406            |
| <i>Shh-ZRS</i>  | 241                             | 276 ( $p = 0.002$ ) | 268 ( $p = 0.006$ )  | 276 ( $p = 0.004$ )  | 242                | 221            |

Statistical analysis of data for Figures 5B. Interprobe distances are median values,  $p$ -values from Mann-Whitney U Tests.

**Table S4. Median interprobe distances for *Shh-SBE2*, *SBE2-ZRS* and *Shh-ZRS* probes in wild type and  $\Delta$ CTCF E11.5 limb distal anterior tissue**

| Anterior        | WT                              | $\Delta$ CTCF1       | $\Delta$ CTCF2       | $\Delta$ CTCF3       | $\Delta$ CTCF4 | $\Delta$ CTCF5     |
|-----------------|---------------------------------|----------------------|----------------------|----------------------|----------------|--------------------|
| <b>Fosmids</b>  | <b>Interprobe distance (nm)</b> |                      |                      |                      |                |                    |
| <i>Shh-SBE2</i> | 422                             | 587 ( $p < 0.0001$ ) | 486 ( $p = 0.0003$ ) | 607 ( $p < 0.0001$ ) | 486            | 422                |
| <i>SBE2-ZRS</i> | 425                             | 486 ( $p = 0.02$ )   | 436                  | 427                  | 411            | 314 ( $p = 0.03$ ) |
| <i>Shh-ZRS</i>  | 250                             | 342 ( $p = 0.0001$ ) | 314 ( $p = 0.02$ )   | 341 ( $p = 0.001$ )  | 268            | 276                |

Statistical analysis of data for Figures 5C. Interprobe distances are median values,  $p$ -values from Mann-Whitney U Tests.

**Table S5. Co-localisation frequency (<200 nm) of *Shh* and ZRS probes in wild type and  $\Delta$ CTCF E11.5 distal anterior and posterior limb tissue**

| Tissue        | WT                                   | $\Delta$ CTCF1     | $\Delta$ CTCF2      | $\Delta$ CTCF3     | $\Delta$ CTCF4    | $\Delta$ CTCF5 |
|---------------|--------------------------------------|--------------------|---------------------|--------------------|-------------------|----------------|
| <b>Tissue</b> | <b>Co-localisation Frequency (%)</b> |                    |                     |                    |                   |                |
| Anterior      | 20                                   | 10.9               | 14.9                | 11                 | 15.7              | 17             |
| Posterior     | 36                                   | 22 ( $p = 0.008$ ) | 17 ( $p = 0.0003$ ) | 22 ( $p = 0.008$ ) | 26 ( $p = 0.04$ ) | 32             |

Statistical analysis of data for Fig. 5D.  $p$ -values from Fisher's Exact Tests.

**Table S6. Median interprobe distances for *Shh*-SBE2, SBE2-ZRS, *Shh*-ZRS & ZRS-*Mnx1* probes in wild type,  $\Delta 35$  and Inv35 ESCs**

| ESCs             | WT                       | 35kb $\Delta$       | 35kbInv            |
|------------------|--------------------------|---------------------|--------------------|
| Fosmids          | Interprobe distance (nm) |                     |                    |
| <i>Shh</i> -SBE2 | 405                      | 347 ( $p = 0.04$ )  |                    |
| SBE2-ZRS         | 351                      | 286 ( $p = 0.049$ ) |                    |
| <i>Shh</i> -ZRS  | 336                      | 275 ( $p = 0.01$ )  |                    |
| ZRS- <i>Mnx1</i> | 421                      | 349 ( $p = 0.002$ ) | 376 ( $p = 0.04$ ) |

Statistical analysis of data for Figures 7D. Interprobe distances are median values,  $p$ -values from Mann-Whitney U Tests.

**Table S7. RT-PCR primers**

| Region          | Primers                                                                                   |
|-----------------|-------------------------------------------------------------------------------------------|
| <i>qRT Shh</i>  | F- ACCCCGACATCATATTTAAGGA<br>R- TTAACCTGTCTTTGCACCTCTGA                                   |
| <i>qRTMnx1</i>  | F- GATGCCGACTTCAGCTC<br>R- AGCTGCTGGCTGGTGAAG                                             |
| <i>RT Lmbr1</i> | ex1 F- ACAGCCAAGTGCAGAGTCC<br>ex5 F- TTCTTTCTGGAATCAGAAGG<br>ex6 R- CCATACTGGCAGCATCACTGT |
| <i>RT Hprt</i>  | F- CACAGGACTAGAACACCTGC<br>R- GCTGGTGAAAAGGACCTC                                          |

**Table S8. Fosmid Probes**

| Region           | Whitehead (Sanger) Name | Ensembl name  | Coordinates |          | Size (bp) |
|------------------|-------------------------|---------------|-------------|----------|-----------|
|                  |                         |               | Start       | End      |           |
| <i>Cnpy1</i>     | W11-2816N11             |               | 28567538    | 28605641 | 38104     |
| <i>Shh</i>       | W11-0574O18             | G135P64333A4  | 28754458    | 28795879 | 41421     |
| SBE2             | W11-1275C09             | G135P603171G8 | 29195832    | 29239355 | 43523     |
| ZRS              | W11-1047E14             | G135P600929F6 | 29611727    | 29653695 | 41968     |
| <i>Lmbr1</i> pr. | W11-2285K14             |               | 29692859    | 29736053 | 43195     |
| <i>Mnx1</i>      | W11-1204B06             |               | 29791124    | 29827491 | 36368     |

Names are Ensembl (r 45) ([http://jun2007.archive.ensembl.org/Mus\\_musculus/index.html](http://jun2007.archive.ensembl.org/Mus_musculus/index.html)). Mouse genome assembly number: NCBI m37

**Table S9. Mouse 5C primers for *Shh* and *USP22* regions**

[Click here to Download Table S9](#)

**Table S10. 5C sequencing reads**

| <b>E11.5 tissues</b>       |                 |                      |
|----------------------------|-----------------|----------------------|
| Sample                     | Number of reads | Number of used reads |
| E11.5 Body                 | 2810910         | 1090908              |
| E11.5 700kbΔ rep 1i        | 1562060         | 1082158              |
| E11.5 700kbΔ rep 1ii       | 1415296         | 963894               |
| E11.5 700kbΔ rep 2i        | 2566066         | 1853170              |
| E11.5 700kbΔ rep 2ii       | 3898600         | 2847490              |
| E11.5 Anterior limb rep 1  | 3302406         | 1925282              |
| E11.5 Anterior limb rep 2  | 4664488         | 2579458              |
| E11.5 Posterior limb rep 1 | 2340108         | 1432302              |
| E11.5 Posterior limb rep 2 | 4721304         | 2662420              |
| E14 ESCs wild type rep 1   | 2999100         | 1850978              |
| E14 ESCs wild type rep 2   | 3842910         | 2447598              |
| E14 ESCs ΔCTCF1 rep1       | 4324812         | 3370342              |
| E14 ESCs ΔCTCF1 rep 2      | 4803792         | 3744989              |
| E14 ESCs ΔCTCF2 rep1       | 5037248         | 2652966              |
| E14 ESCs ΔCTCF2 rep2       | 4197292         | 2230540              |
| E14 ESCs ΔCTCF3 rep1       | 4530282         | 2634184              |
| E14 ESCs ΔCTCF3 rep2       | 3623840         | 1803502              |
| E14 ESCs ΔCTCF4 rep1       | 4123544         | 2876952              |
| E14 ESCs ΔCTCF4 rep2       | 2760100         | 1839494              |
| E14 ESCs ΔCTCF5 rep1       | 3982104         | 1852298              |
| E14 ESCs ΔCTCF5 rep2       | 3957266         | 1706900              |
| E14 ESCs Δ35kb rep 1       | 3027284         | 2464184              |
| E14 ESCs Δ35kb rep 2       | 3352334         | 2732898              |

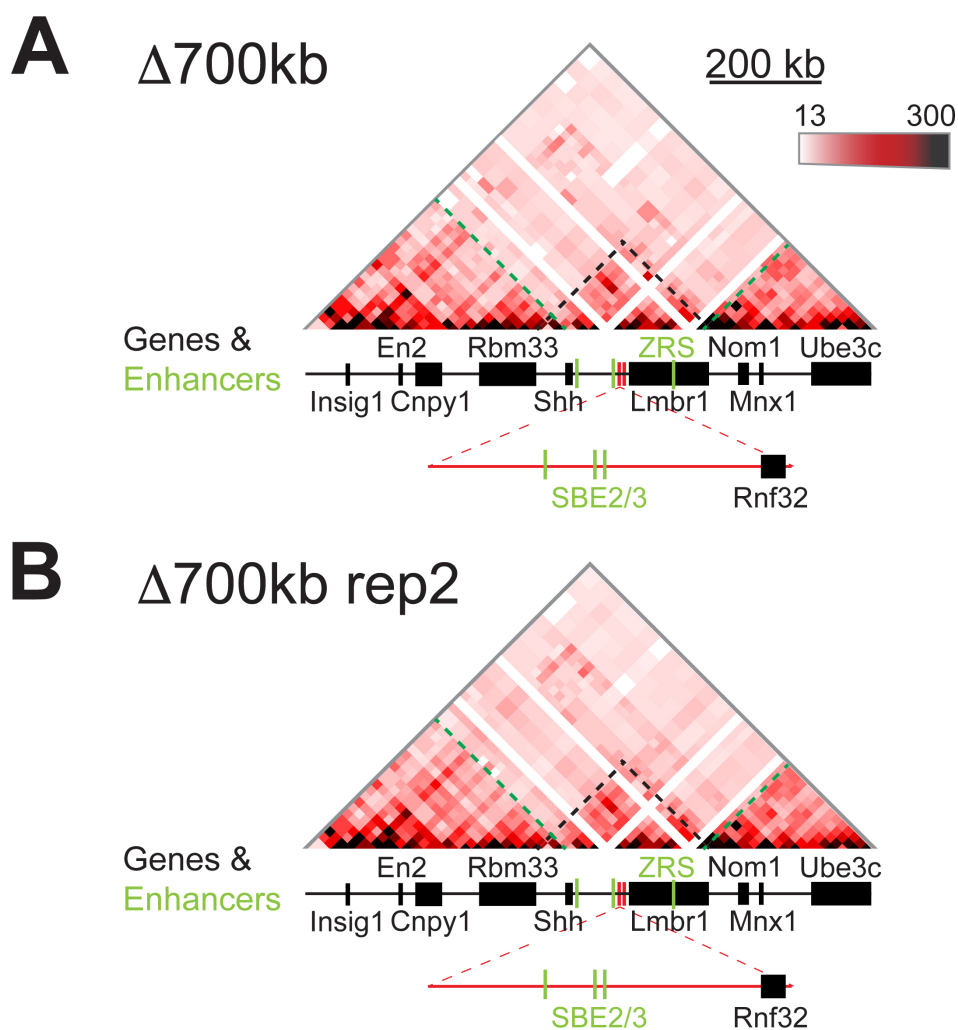

**Figure S1. Unchanged *Shh* TAD boundaries and 5C-seq enriched interactions between loci containing *Shh* and ZRS in biological replicates of cells derived from  $E11.5^{\Delta 700\text{kb}/\Delta 700\text{kb}}$  embryos. (A & B) Heat maps show the average interaction frequencies across *Shh* and its regulatory domain in E11.5 whole embryos homozygous for the 700kb deletion (replicate biological sample). Interaction frequencies were normalized to sum up to 50000 reads and adaptive coarsegraining of the matrices were performed to reduce noise with the three lowest coverage bins masked and the data shown is binned over 21-kb windows and are colour-coded according to the corresponding scales as described in Figure 1F. Green dashed lines highlight the TAD boundary locations, black dashed lines indicate the *Shh* TAD boundaries and the reduced size of the TAD.**

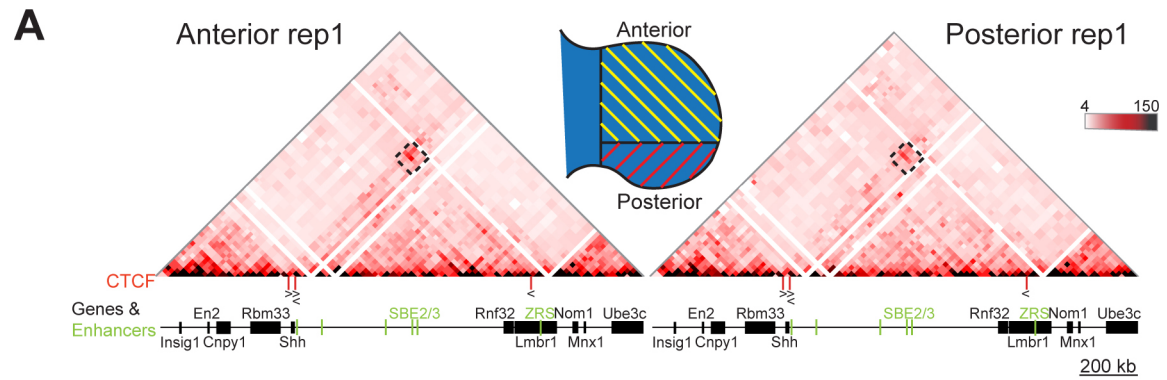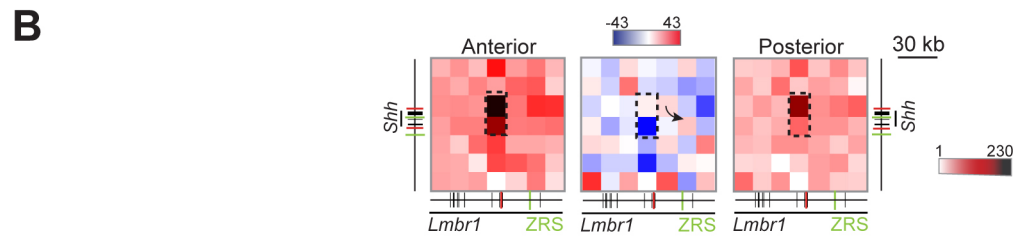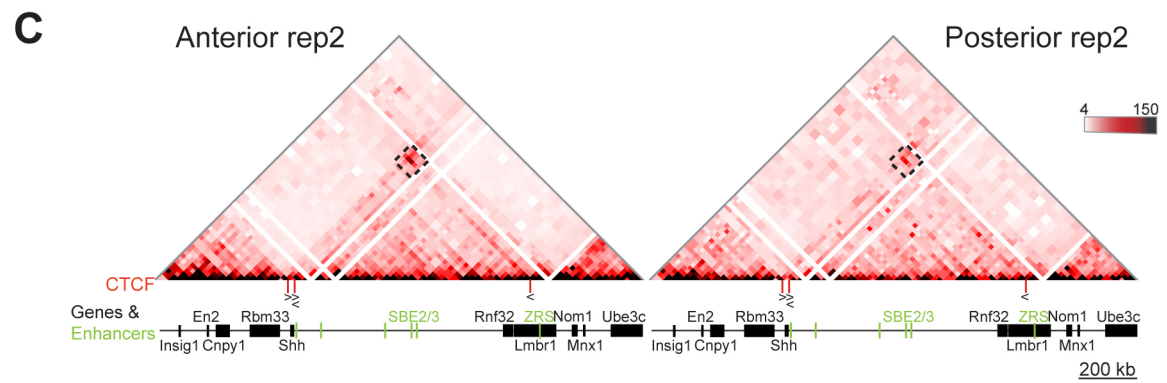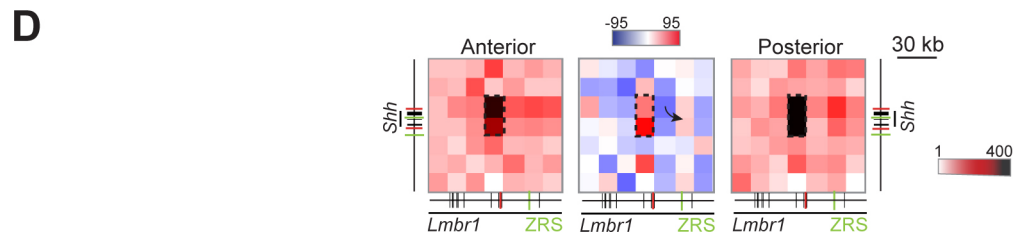

**Figure S2. 5C-seq analysis in biological replicates of cells dissected from E11.5 distal anterior and posterior tissue. (A)** Heat maps showing 5C data from distal anterior and posterior limb bud cells of E11.5 embryos, across the 1.7-Mb *Shh* region shown in Figure 1. Heat map intensities represent the average of interaction frequency for each window, colour-coded according to the scale shown. Interaction frequencies were normalized to sum up to 50000 reads and adaptive coarsegraining of the matrices were performed to reduce noise with the three lowest coverage bins masked and the data shown is binned over 21-kb windows. Green dashed lines indicate TAD boundaries, the interactions highlighted by the black dashed boxes locate the region of the heat maps shown in **(B)** at higher resolution. Schematic indicating the limb bud portions dissected for anterior and posterior cell populations. **(B)** Higher resolution (15-kb binning) heat maps from 5C data displayed in **(A)** showing interactions between 105kb genomic regions encompassing *Shh* and ZRS. Left-hand and right-hand heat maps from anterior and posterior tissues respectively with intensities representing the average of interaction frequency for each window, colour-coded according to the scale shown based on raw 5C data sets. The comparison heatmap (centre), with compared data sets normalised by read count, shows interactions enriched in posterior cells (red) and anterior cells (blue). Enriched interactions between loci containing CTCF binding sites are indicated by the black dashed boxes, the arrow in the comparison heat map highlights posterior enriched interactions between *Shh* and ZRS. **(C & D)** Second biological replicates showing 5C data for distal anterior and posterior limb bud cells of E11.5 embryos at 21-kb resolution **(C)** as in **(A)** and zoomed in higher resolution (15-kb) **(D)** as in **(B)**.

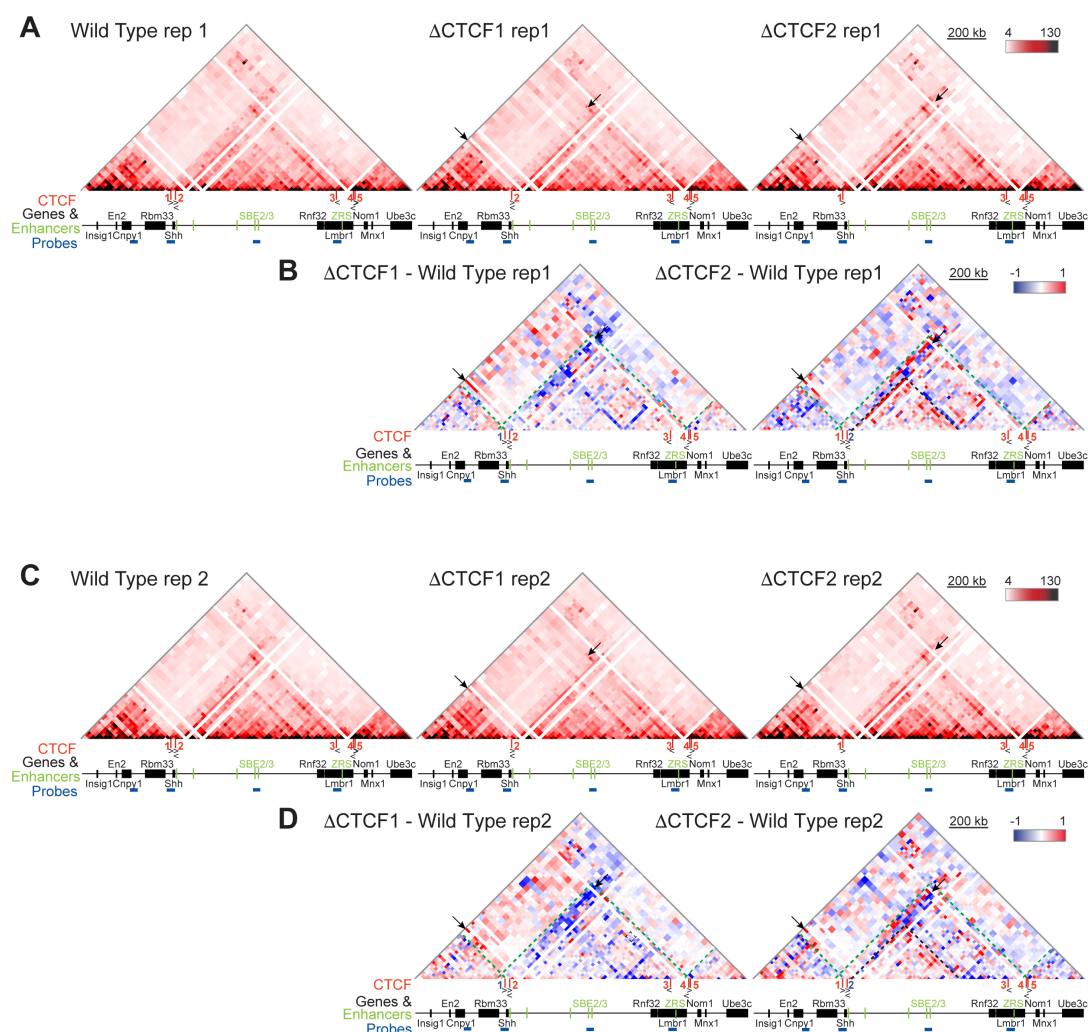

**Figure S3. 5C-seq identifies perturbations to chromatin conformation in biological replicates of  $\Delta$ CTCF1 and  $\Delta$ CTCF2 ESCs. (A & C)** Heat maps showing 5C data from two biological replicates of wild type,  $\Delta$ CTCF1 and  $\Delta$ CTCF2 ESCs across the 1.7-Mb *Shh* region shown in Figure 1. Heat map intensities represent the average of interaction frequency for each window, colour-coded according to the scale shown. Interaction frequencies were normalized to sum up to 50000 reads and adaptive coarsegraining of the matrices were performed to reduce noise with the three lowest coverage bins masked and the data shown is binned over 21-kb windows. **(B & D)** Heat maps comparing  $\Delta$ CTCF1 or  $\Delta$ CTCF2 enrichment (red) with wild type (blue). For comparison of 5C matrices across conditions, additional observed/expected normalization were performed by dividing each diagonal of the matrix by its mean. Green dashed lines indicate TAD boundaries, black dashed lines highlight enriched contacts within sub-TADs ( $\Delta$ CTCF2), black arrows highlight loss of interactions in  $\Delta$ CTCF1 or  $\Delta$ CTCF2 cells and black arrowheads indicate enriched interactions in  $\Delta$ CTCF1 or  $\Delta$ CTCF2 cells.



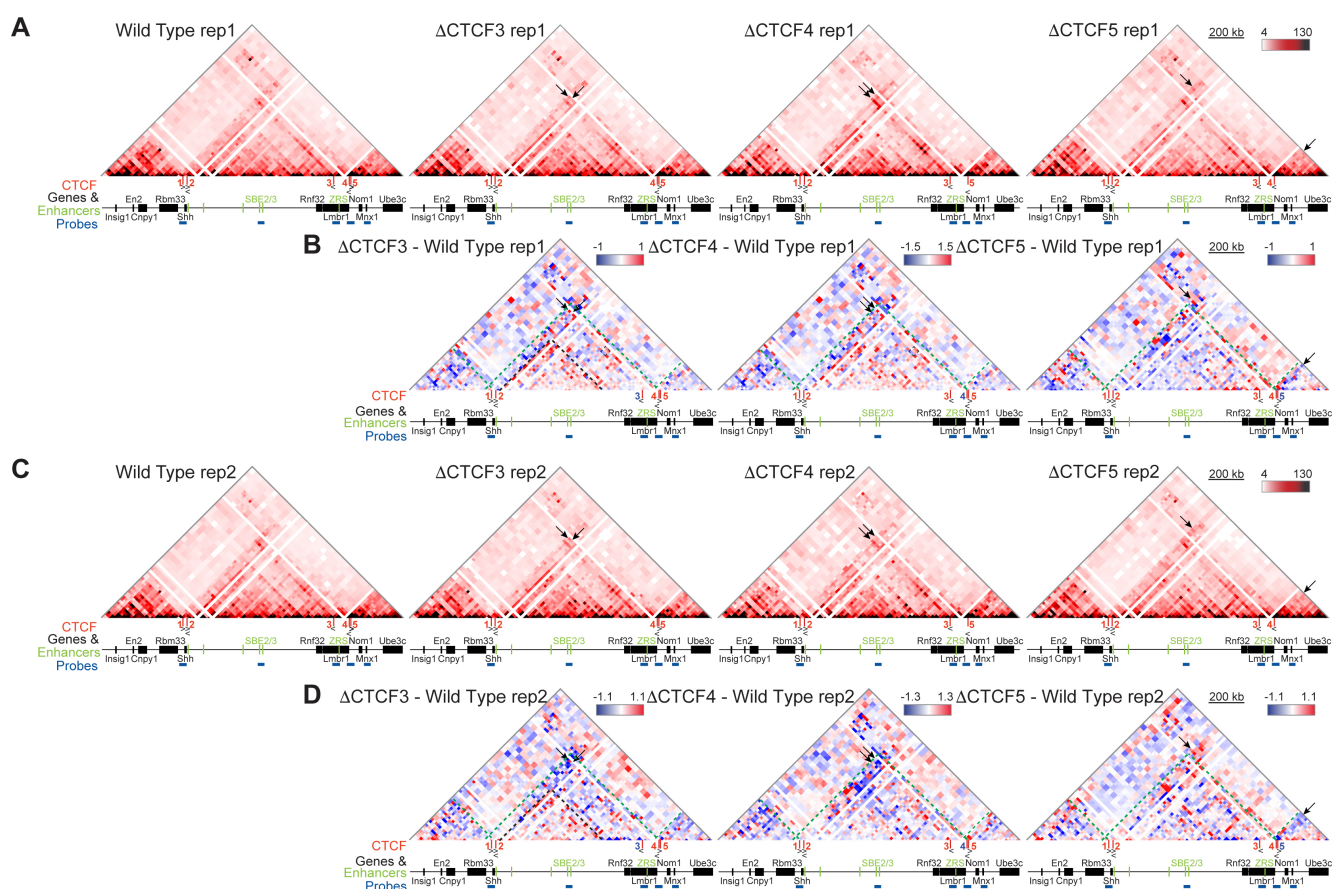

**Figure S4. 5C-seq identifies perturbations to chromatin conformation in biological replicates of  $\Delta$ CTCF3,  $\Delta$ CTCF4 and  $\Delta$ CTCF5 ESCs. (A & C)** Heat maps showing 5C data from two biological replicates of wild type,  $\Delta$ CTCF3,  $\Delta$ CTCF4 and  $\Delta$ CTCF5 ESCs, across the 1.7-Mb *Shh* region shown in Figure 1. Heat map intensities represent the average of interaction frequency for each window, colour-coded according to the scale shown. Interaction frequencies were normalized to sum up to 50000 reads and adaptive coarsegraining of the matrices were performed to reduce noise with the three lowest coverage bins masked and the data shown is binned over 21-kb windows. **(B & D)** Heat maps comparing  $\Delta$ CTCF3,  $\Delta$ CTCF4 or  $\Delta$ CTCF5 enrichment (red) with wild type (blue). For comparison of 5C matrices across conditions, additional observed/expected normalization were performed by dividing each diagonal of the matrix by its mean. Green dashed lines indicate TAD boundaries, black dashed lines highlight enriched contacts within sub-TADs ( $\Delta$ CTCF3), black arrows highlight loss of interactions in  $\Delta$ CTCF3 or  $\Delta$ CTCF5 cells and black arrowheads indicate enriched interactions in  $\Delta$ CTCF3 or  $\Delta$ CTCF5 cells.

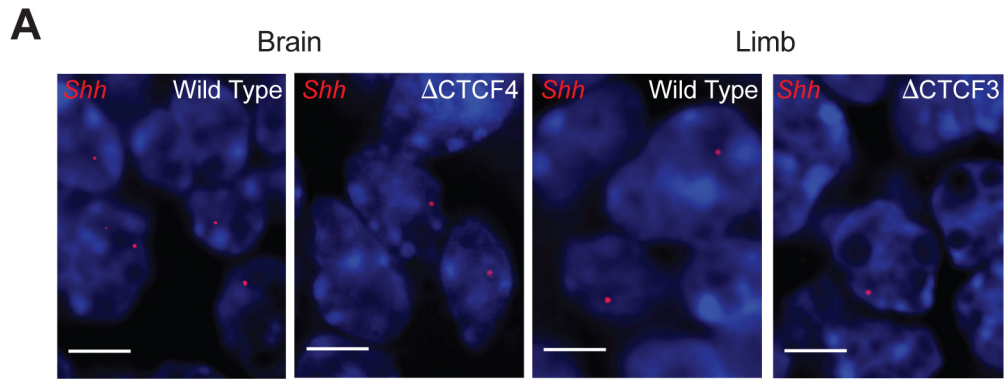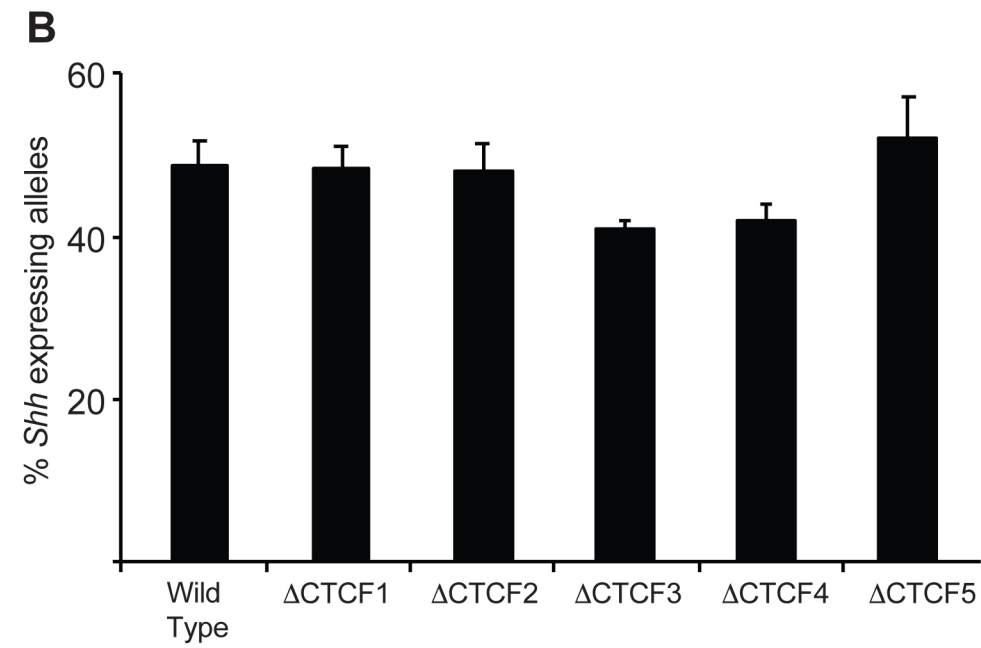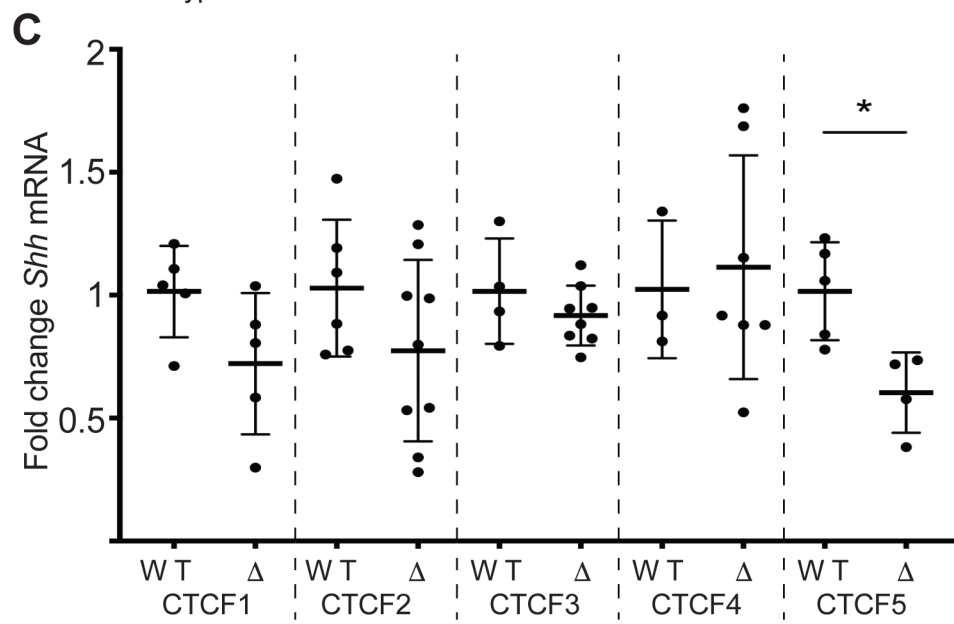

**Figure S5. *Shh* RNA FISH and qRT-PCR for limb buds. (A)** Images of representative RNA FISH signal (red) of *Shh*-expressing nuclei within the brain and ZPA of limb tissue of E11.5 wild type and  $\Delta$ CTCF embryos. Scale bars = 5  $\mu$ m. **(B)** Counts of expressing alleles detected by RNA FISH within the ZPA of the E11.5 limb bud. The statistical significance between data sets was examined by Fisher's exact test. **(C)** Graph of fold change of *Shh* expression determined by qRT-PCR of cDNA made from E11.5 limb buds. Mutants from each of  $\Delta$ CTCF lines are compared to wild type litter mates. Each dot represents a single embryo and data is graphed as mean  $\pm$  SD. The statistical significance between data sets was examined using unpaired Student t-tests, \* < 0.05.

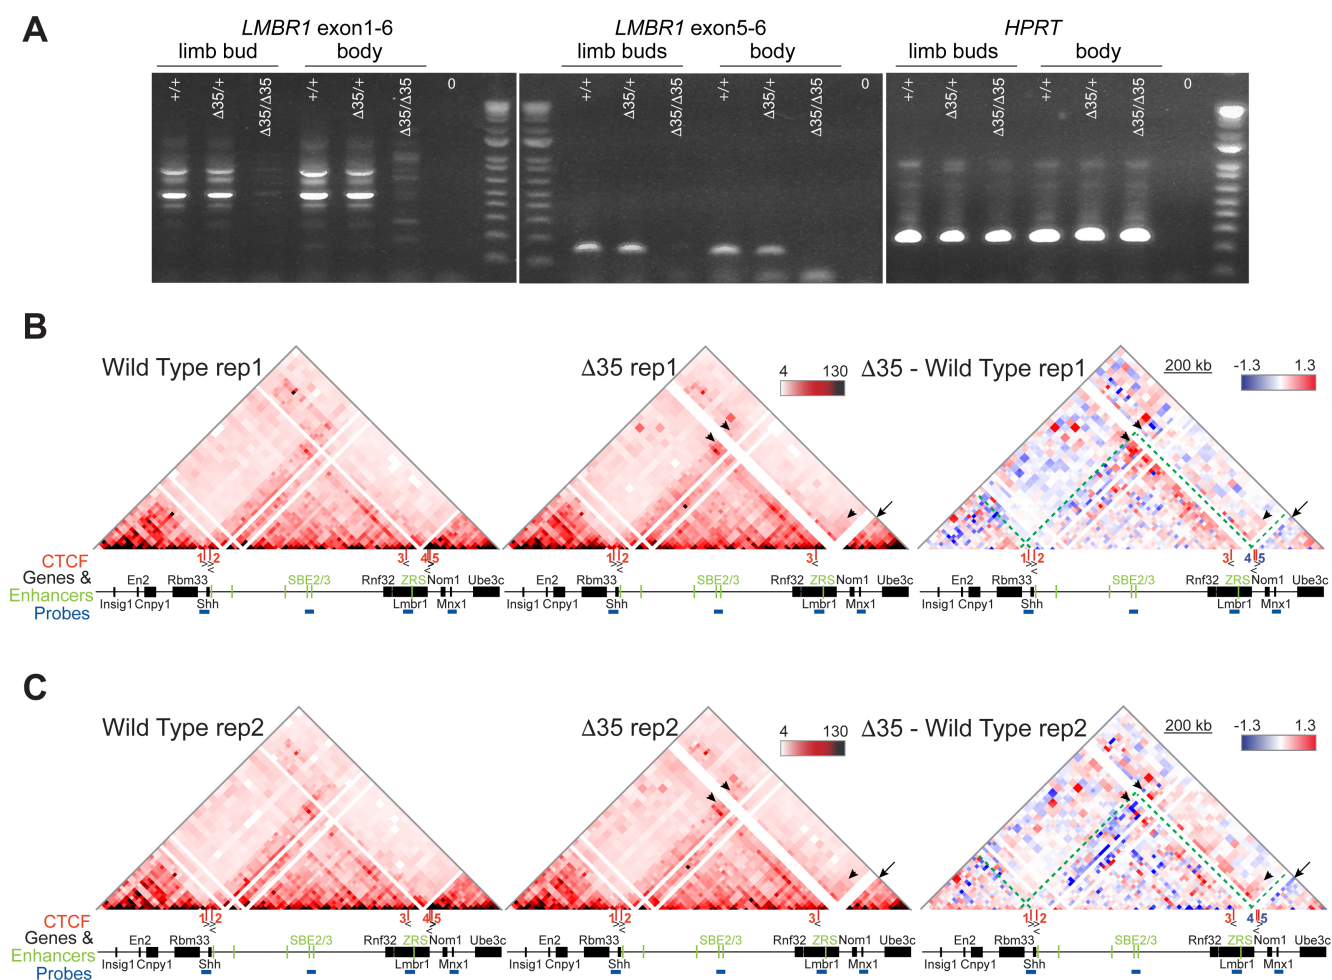

**Figure S6. 5C-seq identifies perturbations to local chromatin conformation in biological replicates of  $\Delta 35$  ESCs.**

**(A)** RT-PCR analysis of gene expression in limb buds and bodies from E11.5 wild type, heterozygous and homozygous 35kb deletion ( $\Delta 35$ ) embryos showing a loss of transcription through *Lmbr1*. **(B & C)** Heat maps showing 5C data from two biological replicates of wild type and  $\Delta 35$  ESCs, across the 1.7-Mb *Shh* region shown in Figure 1. Heat map intensities represent the average of interaction frequency for each window, colour-coded according to the scale shown. Interaction frequencies were normalized to sum up to 50000 reads and adaptive coarsegraining of the matrices were performed to reduce noise with the three lowest coverage bins masked and the data shown is binned over 21-kb windows. Right-hand heat maps comparing  $\Delta 35$  enrichment (red) with wild type (blue). For comparison of 5C matrices across conditions, additional observed/expected normalization were performed by dividing each diagonal of the matrix by its mean. Green dashed lines indicate TAD boundaries, black arrows highlight loss of interactions in  $\Delta 35$  cells and black arrowheads indicate enriched interactions in  $\Delta 35$  cells.
